# Supplementary material for: Electrografting a Hybrid Bilayer Membrane via Diazonium Chemistry for Electrochemical Impedance Spectroscopy of Amyloid-β Aggregation
Source: MDPI journal article supplement (doi:10.3390/mi13040574), 2022-04-05
Supplement: s1 [file s1]

***Supplementary Information***

***for***

**Electrografting a Hybrid Bilayer Membrane via  
Diazonium Chemistry for Electrochemical Impedance  
Spectroscopy of Amyloid- $\beta$  Aggregation**

Hamid Fini<sup>†</sup>, Qusai Hassan<sup>†</sup>, Meissam Noroozifar and Kagan Kerman<sup>\*,††</sup>

Department of Physical and Environmental Sciences, University of Toronto Scarborough, 1265  
Military Trail, Toronto, M1C 1A4, ON, Canada; h.fini@utoronto.ca (H.F.);  
qusai.hassan@mail.utoronto.ca (Q.H.); m.noroozifar@utoronto.ca (M.N.)

\* Correspondence: kagan.kerman@utoronto.ca (K.K.)

<sup>†</sup> These authors contributed equally.

<sup>††</sup> This paper is dedicated to the memory of Dr. Ari Chow and Professor Ian R. Brown.

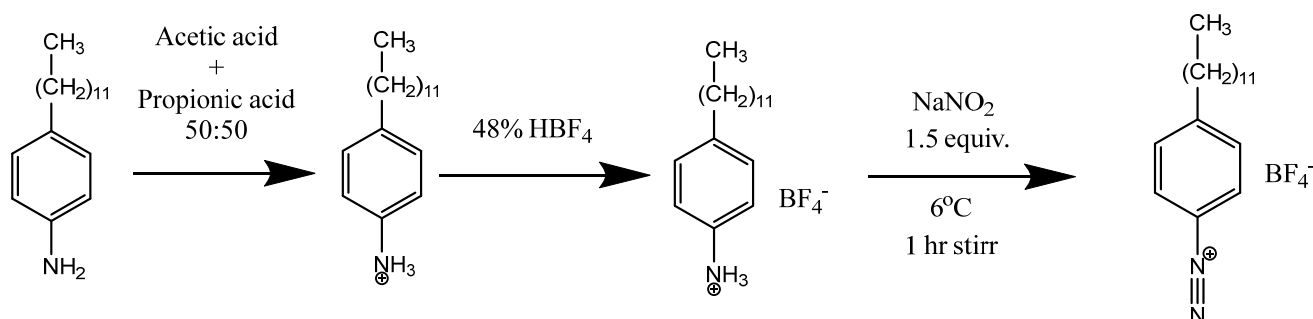

**Scheme S1.** Schematic diagram for synthesis of 4-dodecylbenzenediazonium tetrafluoroborate (DDAN).

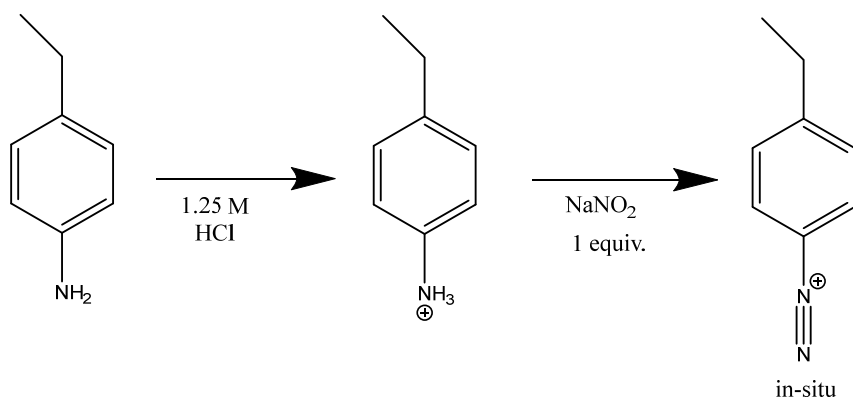

**Scheme S2.** Schematic diagram for *in situ* synthesis of 4-ethylbenzene diazonium (EDAN). As described in the Experimental section, 2 mM ethyl aniline was dissolved in 1.25 M HCl followed by the addition of 1 equivalent of NaNO<sub>2</sub>.

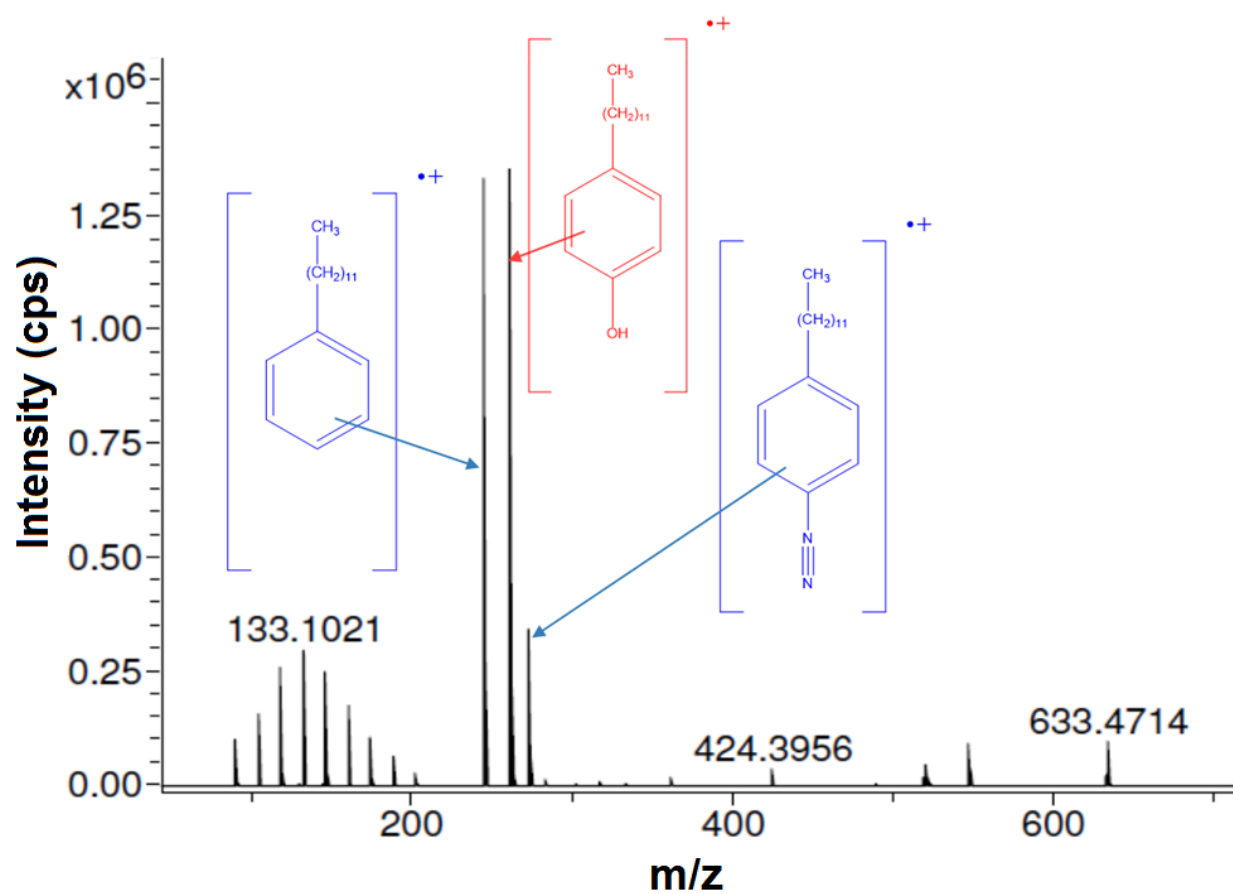

**Figure S1.** Mass spectrometric characterization of the synthesized diazonium salt (DDAN, 4-dodecylbenzene-diazonium tetrafluoroborate).

A

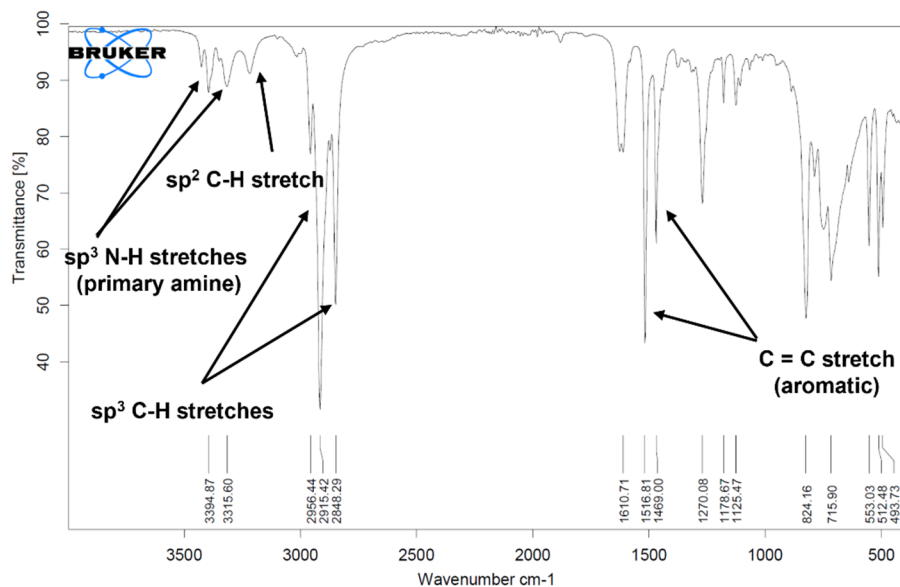

B

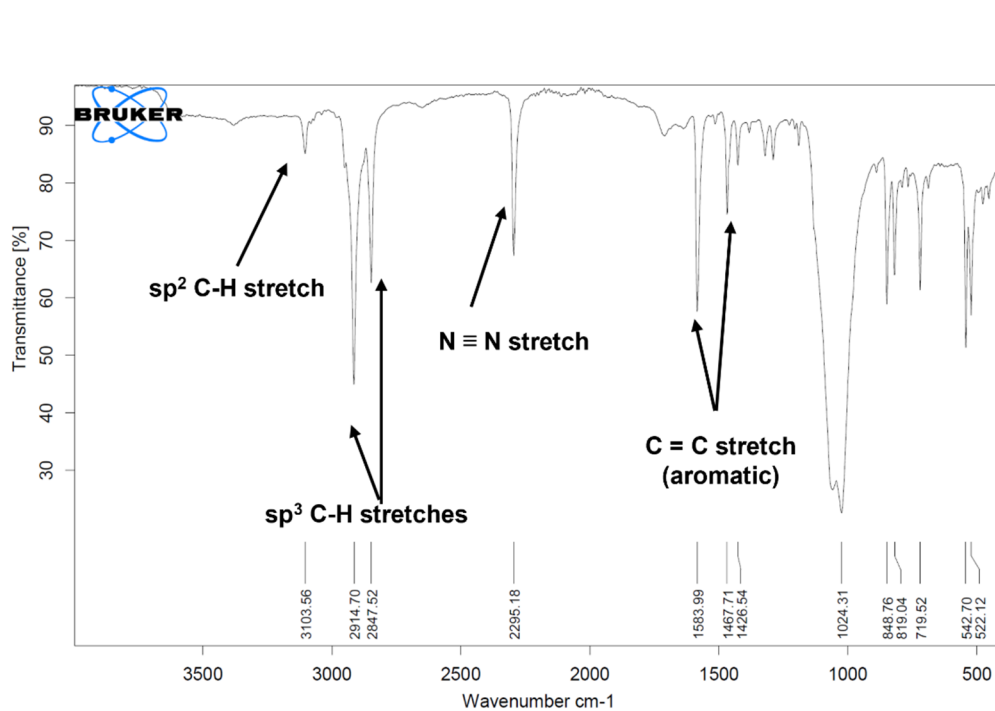

**Figure S2.** FT-IR spectra for the (A) synthesized diazonium salt (DDAN, 4-dodecylbenzene diazonium tetrafluoroborate) and (B) the precursor amine (4-dodecylaniline).

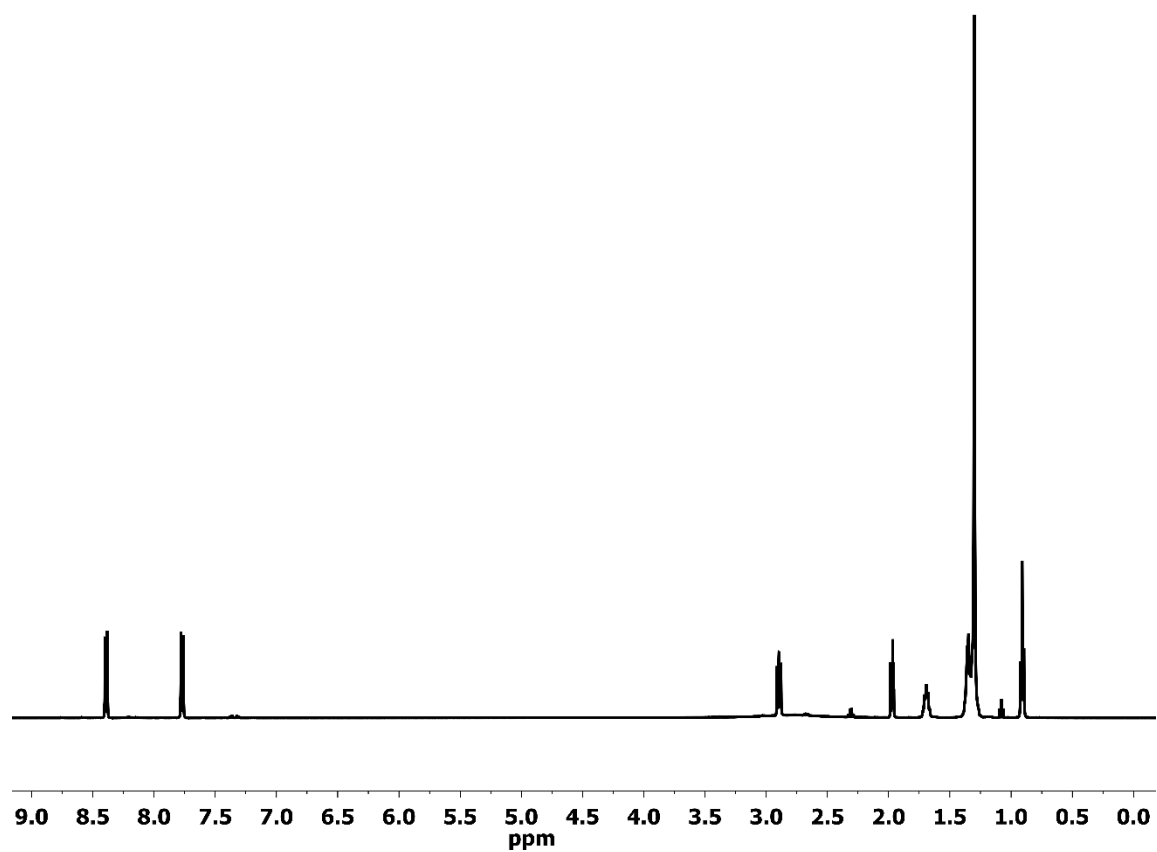

**Figure S3.** NMR spectrum of the synthesized diazonium salt (DDAN, 4-dodecylbenzene diazonium tetrafluoroborate)

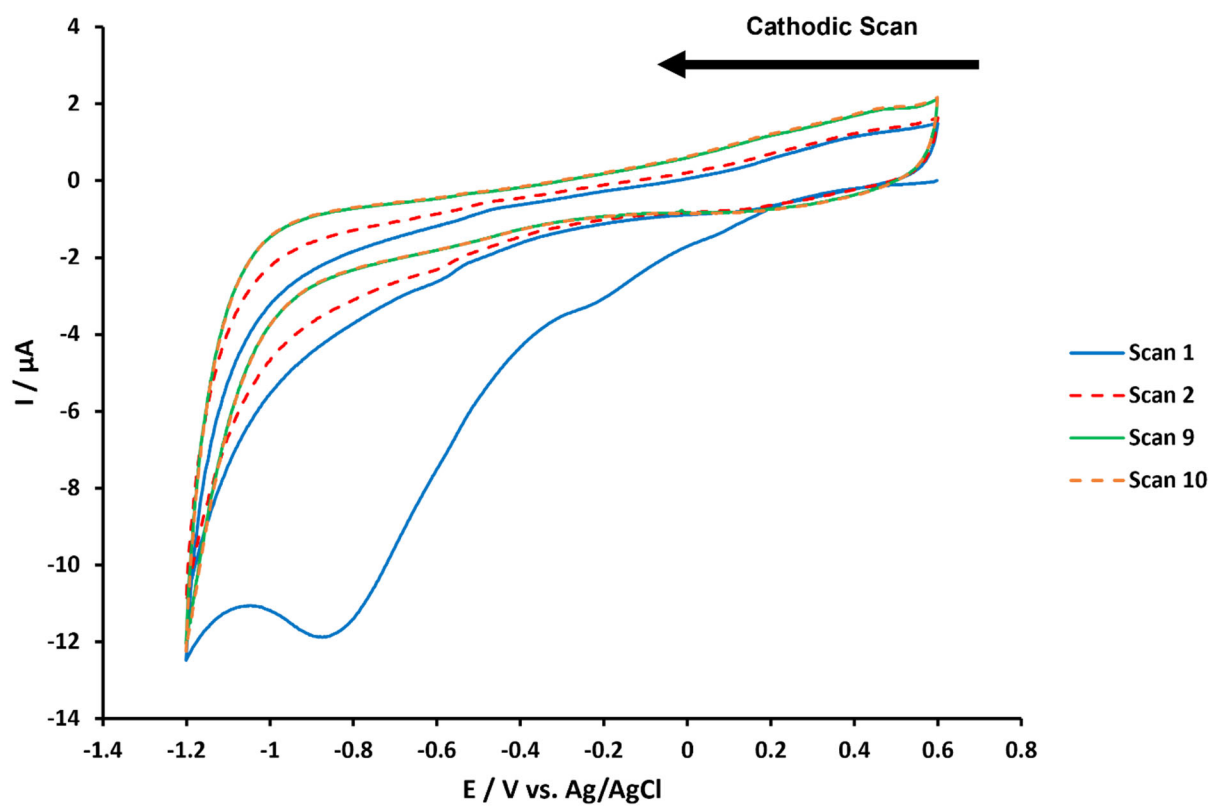

**Figure S4.** Cyclic voltammograms for the electrodeposition of 4-ethylbenzenediazonium (EDAN) on GCE surface at a scan rate of  $50 \text{ mV s}^{-1}$ .

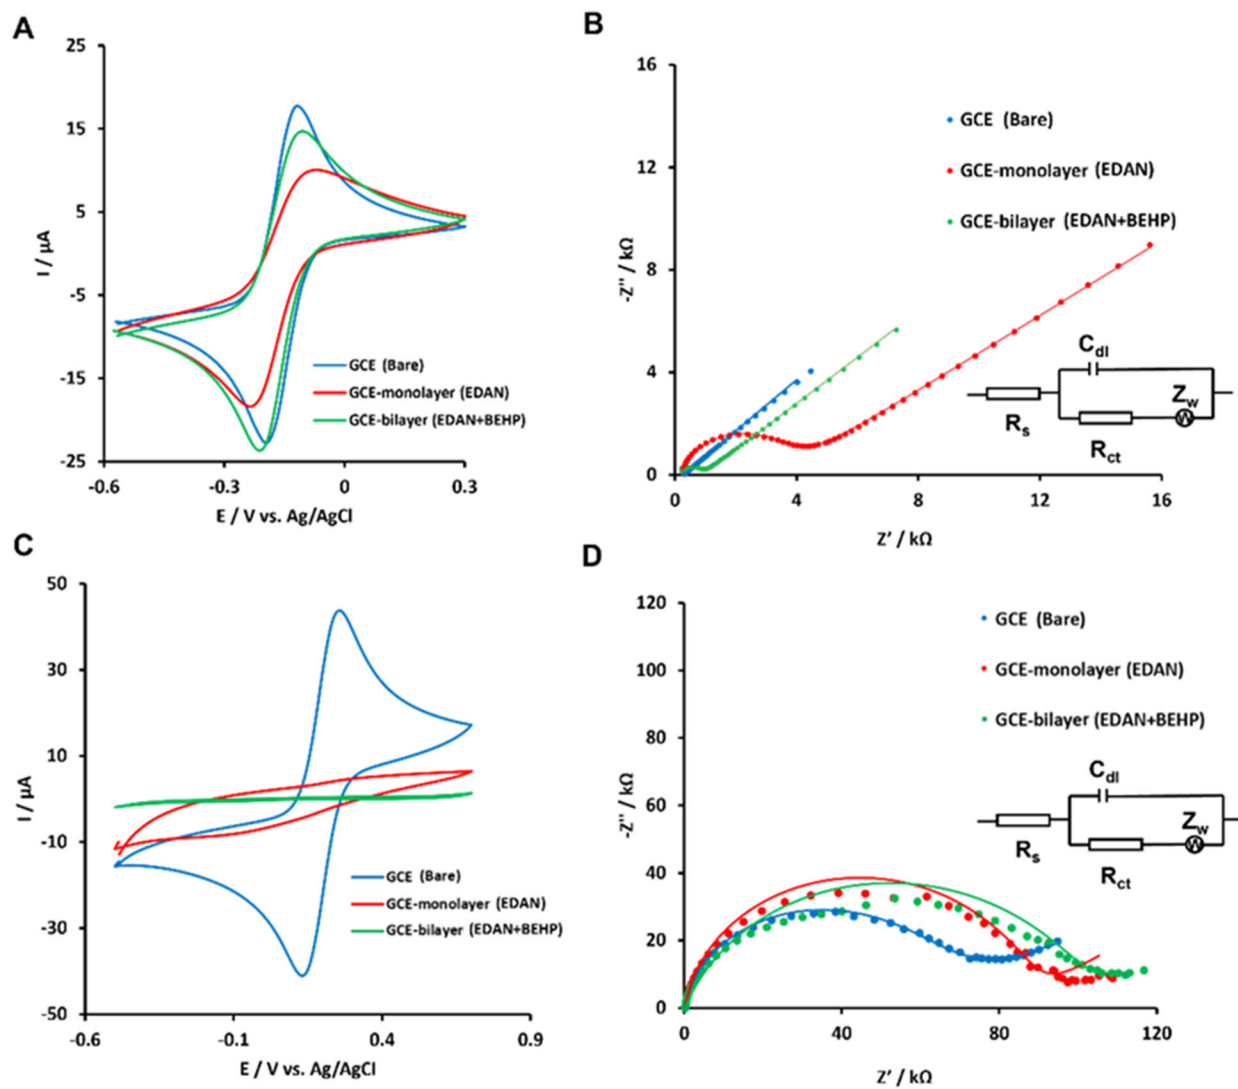

**Figure S5.** Cyclic voltammograms and Nyquist plots of bare GCE, GCE-EDAN layer, and GCE-EDAN-BEHP bilayer (scHBLM)-modified GCEs. (A) and (B) show the respective CV and EIS spectra using  $[\text{Ru}(\text{NH}_3)_6]^{3+}$  as the redox probe. (C) and (D) show the respective CV and EIS spectra using  $[\text{Fe}(\text{CN})_6]^{3-/4-}$  as the redox probe. In Nyquist plots, all dots represent the experimental data and solid lines represent the simulated data at an applied bias of -0.20 V and +0.25 V vs Ag/AgCl at frequencies between 100 MHz and 100 kHz.

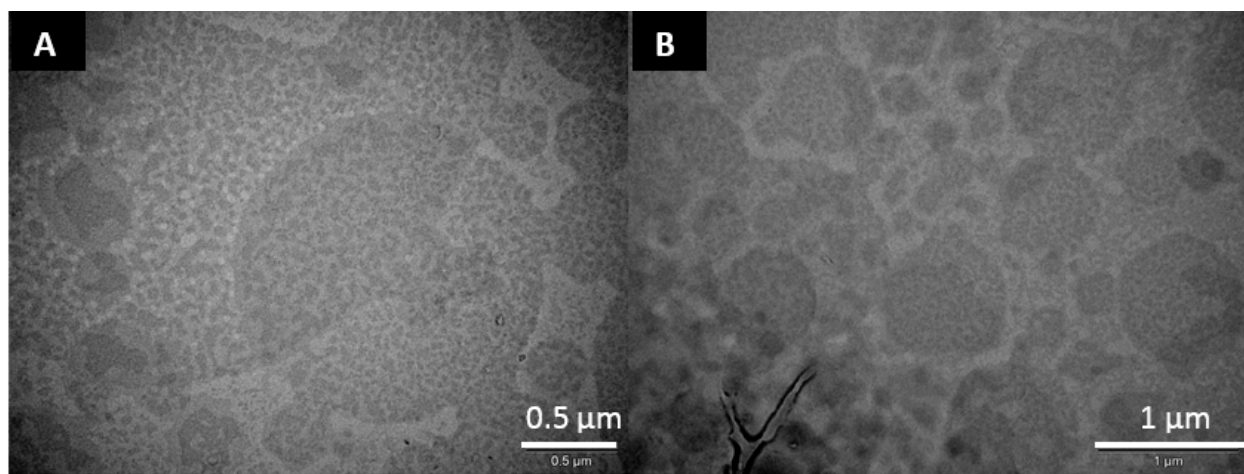

**Figure S6.** TEM images of 10 mM DHP vesicles at (A) 0.5  $\mu\text{m}$  magnification and (B) 1  $\mu\text{m}$  magnification.

**Table S1.** The values of simulated equivalent circuit elements of Nyquist plots as shown in Figures 4B and 4D.

| Electrochemical probe              | Surface modification | $R_s$ | $R_{ct}$ | $C_{dl}$ | $N$   | $Z_w$ | $M$   |
|------------------------------------|----------------------|-------|----------|----------|-------|-------|-------|
| $[\text{Ru}(\text{NH}_3)_6]^{3+}$  | Bare GCE             | 40    | 0.262    | 4.45     | 1     | 215   | 0.5   |
|                                    | DDAN                 | 232   | 55.6     | 48.2     | 0.946 | 5.81  | 0.415 |
|                                    | DDAN-DHP             | 210   | 48.4     | 740      | 0.919 | 38.6  | 0.46  |
| $[\text{Fe}(\text{CN})_6]^{3-/4-}$ | Bare GCE             | 123   | 0.148    | 4.2      | 0.413 | 260   | 0.525 |
|                                    | DDAN                 | 189   | 30       | 60.5     | 0.935 | 5.18  | 0.51  |
|                                    | DDAN-DHP             | 188   | 67.3     | 57.2     | 0.943 | 2.86  | 0.473 |

**Table S2.** The values of simulated equivalent circuit elements of Nyquist plots as shown in Figure 5 with the redox probe  $[\text{Ru}(\text{NH}_3)_6]^{3+}$ .

| Surface modification               | Stirring time | $R_s$ | $R_{ct}$ | $C_{dl}$ | N     | $Z_w$ | M     |
|------------------------------------|---------------|-------|----------|----------|-------|-------|-------|
| <b>GCE-EDAN<br/>(Monolayer)</b>    | No stirring   | 235   | 3.38     | 156      | 0.892 | 80.8  | 0.404 |
|                                    | 1 min         | 232   | 3.82     | 155      | 0.892 | 71.9  | 0.404 |
| <b>GCE-EDAN-BEHP<br/>(Bilayer)</b> | No stirring   | 176   | 754      | 498      | 0.766 | 145   | 0.466 |
|                                    | 1 min         | 171   | 588      | 638      | 0.744 | 174   | 0.472 |

**Table S3.** The values of simulated equivalent circuit elements of Nyquist plots as shown in Figure 6.

| Electrochemical probe              | Incubation time | $R_s$ | $R_{ct}$ | $C_{dl}$ | N     | $Z_w$ | M     |
|------------------------------------|-----------------|-------|----------|----------|-------|-------|-------|
| $[\text{Ru}(\text{NH}_3)_6]^{3+}$  | <b>0</b>        | 193   | 1020     | 39.8     | 0.952 | 560   | 0.493 |
|                                    | <b>10 min</b>   | 181   | 285      | 46.9     | 0.935 | 1070  | 0.526 |
|                                    | <b>24 h</b>     | 173   | 110      | 58.8     | 0.915 | 1740  | 0.531 |
|                                    | <b>48 h</b>     | 204   | 102      | 59.2     | 0.915 | 1930  | 0.495 |
| $[\text{Fe}(\text{CN})_6]^{3-/4-}$ | <b>0</b>        | 196   | 1320     | 38.9     | 0.960 | 236   | 0.352 |
|                                    | <b>10 min</b>   | 183   | 974      | 46.7     | 0.945 | 392   | 0.415 |
|                                    | <b>24 h</b>     | 197   | 291      | 49.2     | 0.937 | 1120  | 0.552 |
|                                    | <b>48 h</b>     | 204   | 240      | 48.3     | 0.941 | 1330  | 0.565 |
